# Supplementary material
Source: Springer Nature journal article supplement (https://www.springermedizin.de/resource/supplementary/12885_2009_2099_MOESM2_ESM.pdf/9460524)

TTAA **G** GTTCC    AGATC **G** CTTT    GCTTTT **G** TT    CTTAG **G** ACAG    AAAGCT **T** GGGC

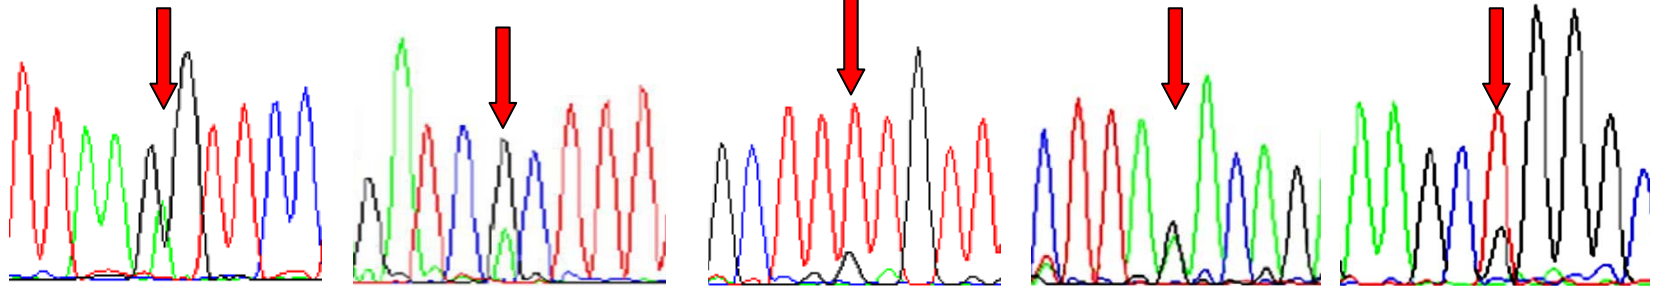

TTAA G GTTCC    AGATC G CTTT    GCTTTT G TT    CTTAG G ACAG    AAAGCT T GGGC

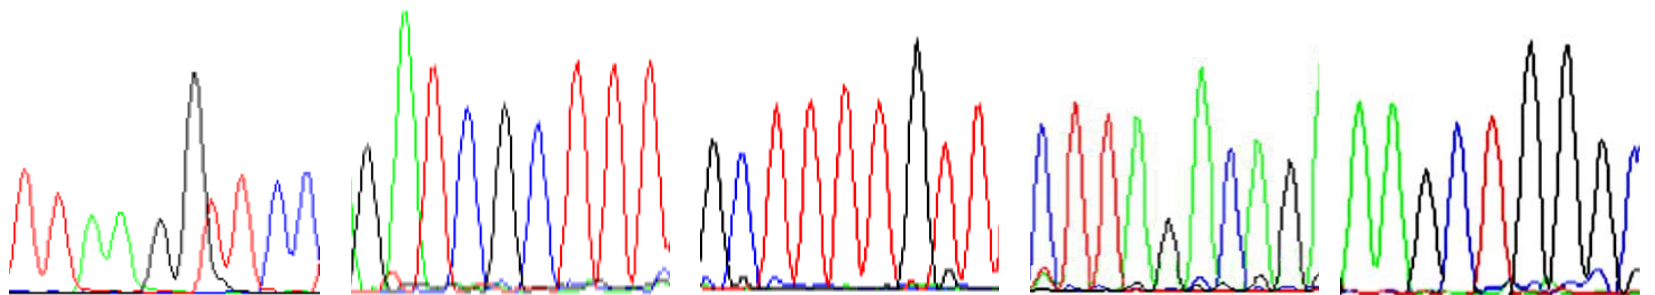

Supplement: MOESM2 [file 9460524]
